# Supplementary material
Source: HighWire-hosted journal article supplement (https://jnm.snmjournals.org/highwire/filestream/109336/field_highwire_adjunct_files/0/263693_Supplemental_Data.pdf)
Supplement: 263693_Supplemental_Data.pdf [file 263693_Supplemental_Data.pdf]

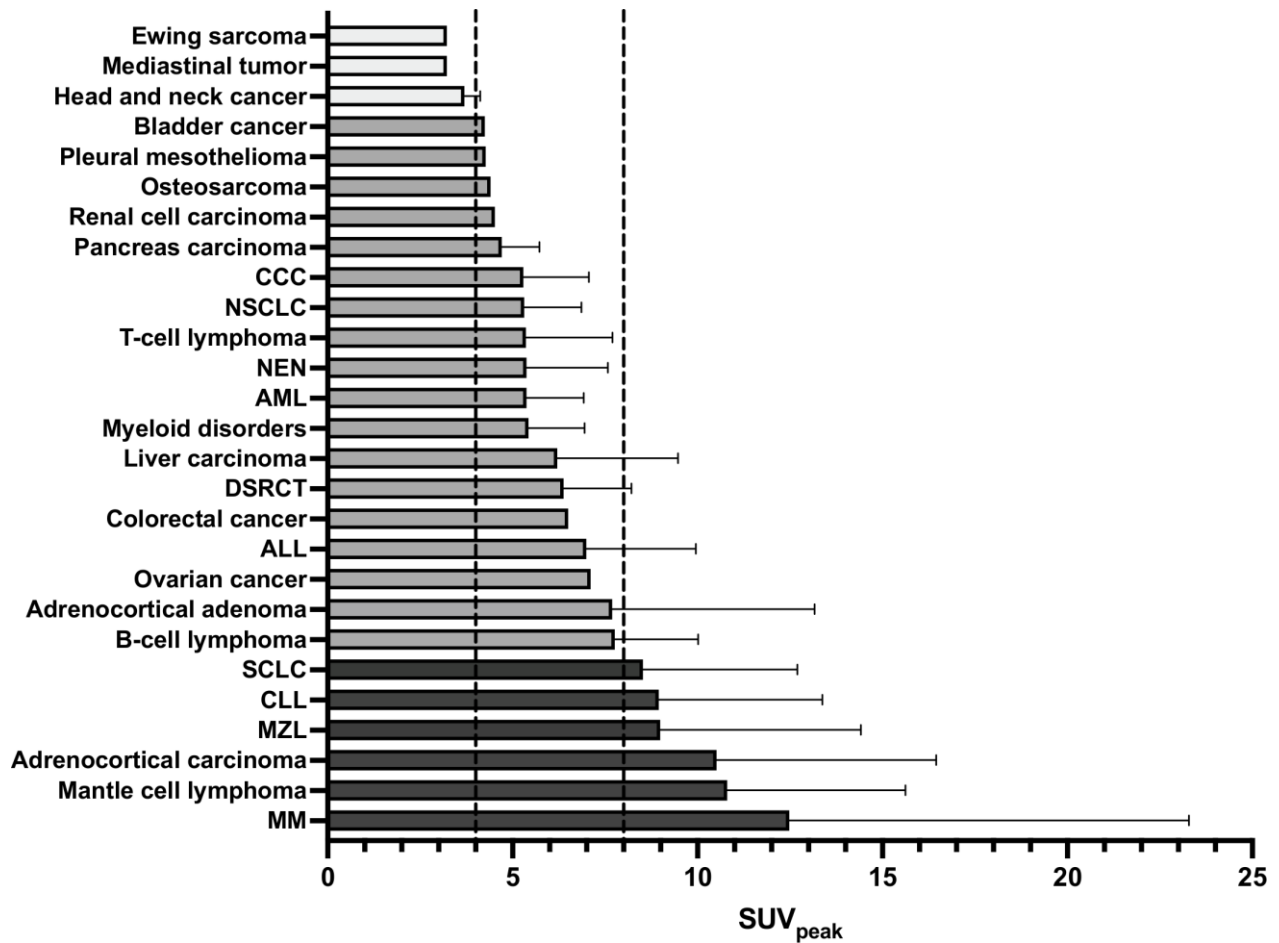

**Supplemental Figure 1.** Bar chart displaying average SUV<sub>peak</sub>. Mean ± SD is indicated. Black dotted lines show SUV<sub>peak</sub> cutoffs of 4 and 8, respectively. CCC = cholangiocarcinoma. NSCLC = non-small cell lung carcinoma. NEN = neuroendocrine neoplasm. AML = acute myeloid leukemia. DSRCT = Desmoplastic Small Round Cell Tumor. ALL = acute lymphoblastoid leukemia. SCLC = small cell lung carcinoma. CLL = chronic lymphocytic leukemia. MZL = marginal zone lymphoma. MM = multiple myeloma.
